# Supplementary material
Source: Royal Society of Chemistry journal article supplement (doi:10.1039/d6cp01686c)
Supplement: d6cp01686c1.pdf [file d6cp01686c1.pdf]

**First-Principles Prediction of  $\beta$ -phase  $\text{SnA}_2\text{N}_4$  (A = Si; Ge) Monolayers:  
Outstanding Mechanical Anisotropy and High Electron Mobility for FET  
Devices**

Yi Peng<sup>a</sup>; Minjia Yao<sup>a</sup>; Fangyuan Li<sup>a</sup>; Yu Chen<sup>a</sup>; Yana Li<sup>a</sup>; Shuangmei Qian<sup>a</sup>; Qianqian Zhu<sup>\*a</sup>;  
Juexian Cao<sup>\*b</sup>

**a:** *Microelectronics and Optoelectronics Technology Key Laboratory of Hunan Higher Education,  
School of Physics and Electronic Electrical Engineering, Xiangnan University, Chenzhou 423000,  
P. R. China*

**b:** *Hunan Institute of Advanced Sensing and Information Technology, Xiangtan University,  
Xiangtan 411105, PR China*

\* E-mail address: pengzhu2022@yeah.net

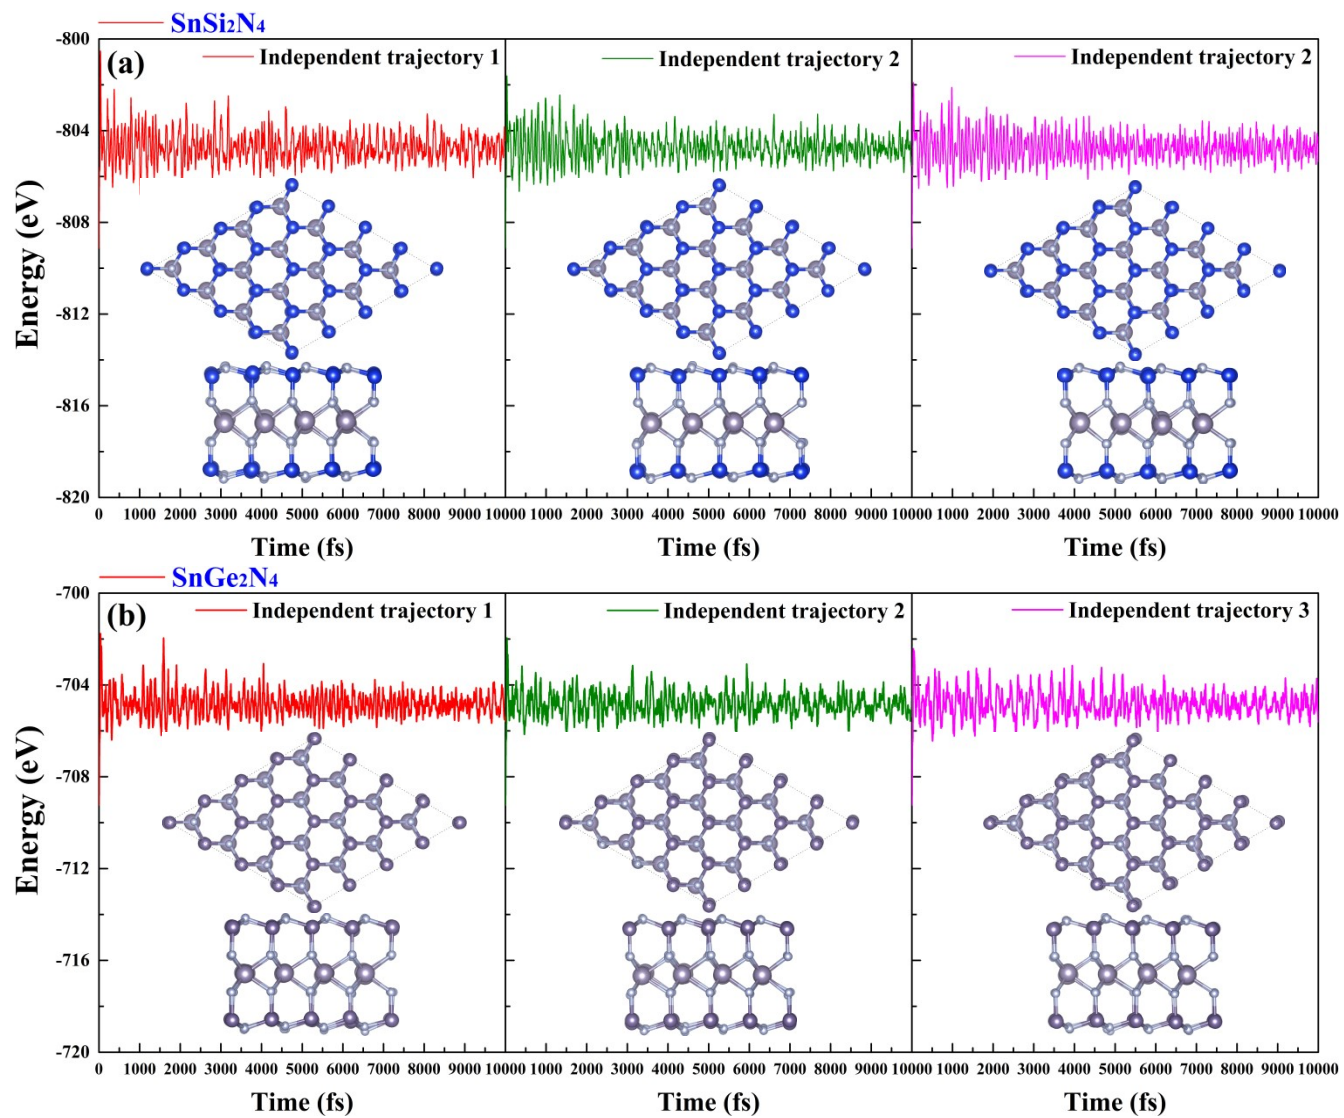

**Fig. S1.** Calculated AIMD simulations of (a)  $\beta$ -SnSi<sub>2</sub>N<sub>4</sub> and (b)  $\beta$ -SnGe<sub>2</sub>N<sub>4</sub> monolayers from three independent trajectories (10 ps, 300 K).

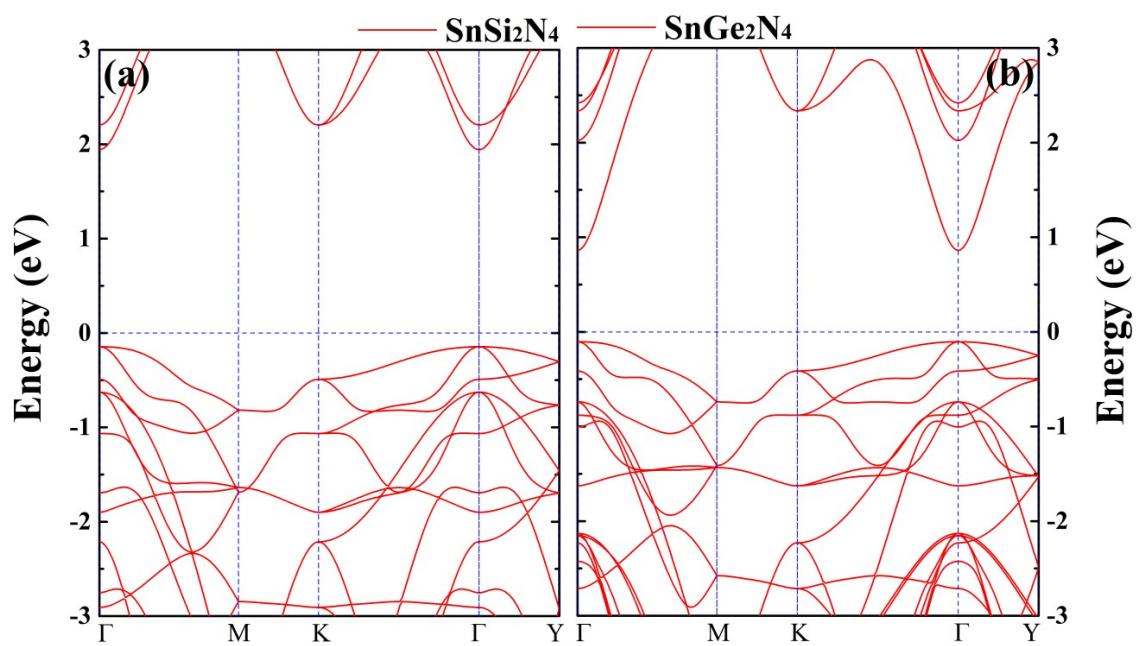

**Fig. S2.** Calculated band structure of orthogonal  $\beta$ -SnSi<sub>2</sub>N<sub>4</sub> (a) and  $\beta$ -SnGe<sub>2</sub>N<sub>4</sub> (b) monolayers

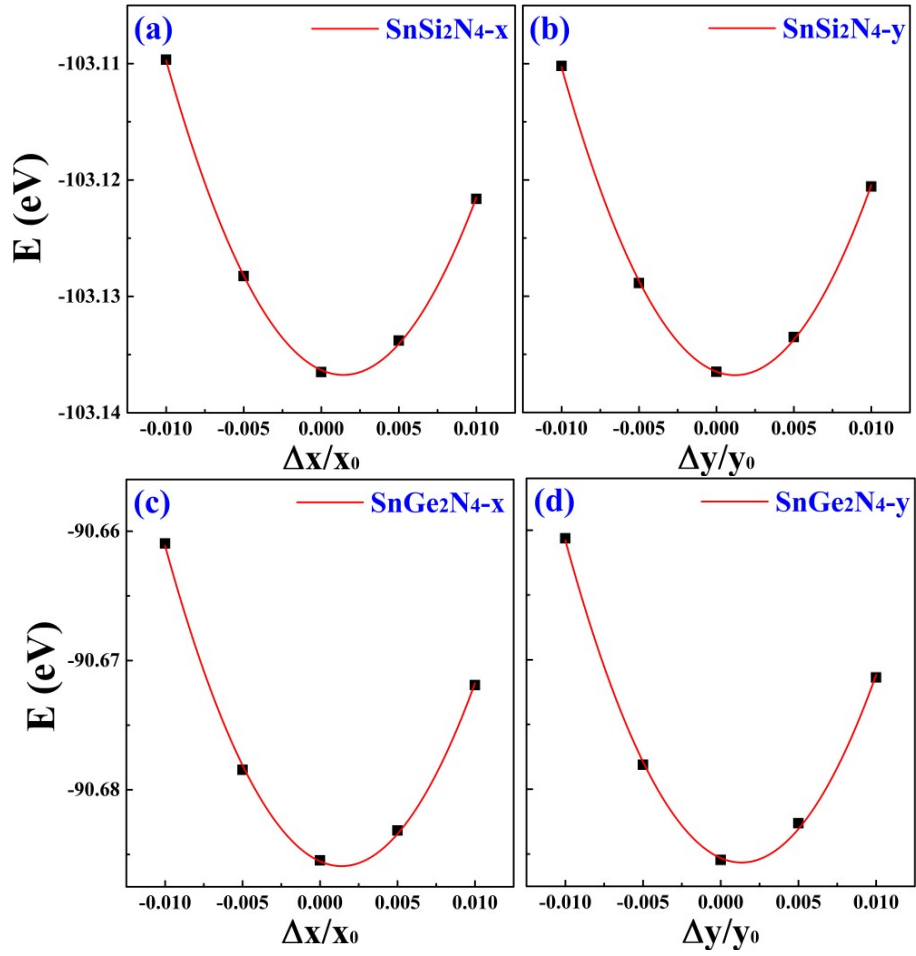

**Fig. S3.** Total energy of  $\beta$ - $\text{SnSi}_2\text{N}_4$  and  $\beta$ - $\text{SnGe}_2\text{N}_4$  monolayers as a function of uniaxial strain along the x and y directions, respectively. The in-plane stiffness  $C$  can be obtained after fitting the parabola.

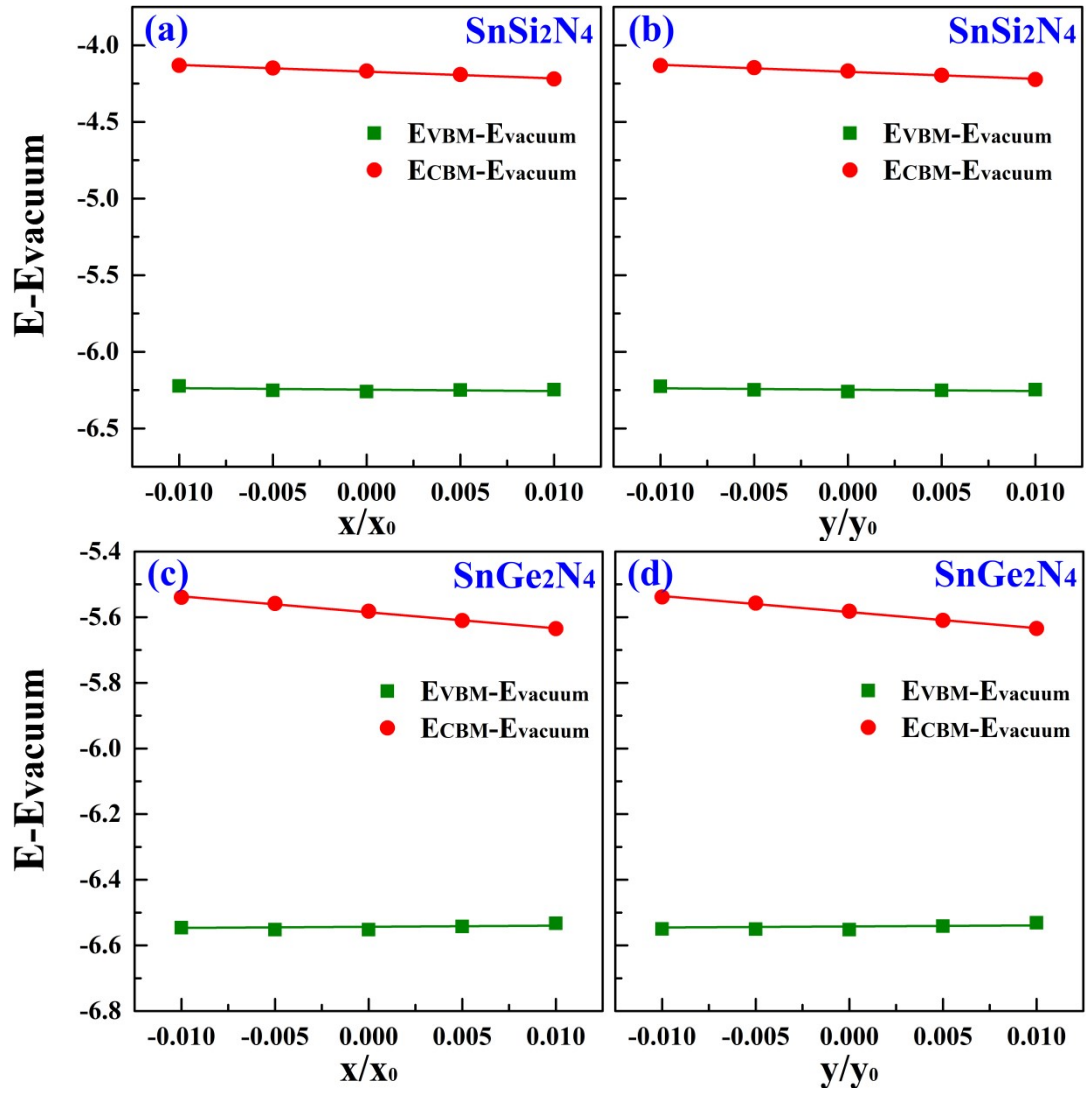

**Fig. S4.** Band edge positions (CBM and VBM) of  $\beta$ -SnSi<sub>2</sub>N<sub>4</sub> and  $\beta$ -SnGe<sub>2</sub>N<sub>4</sub> monolayers, referenced to the vacuum level, as a function of lattice strain along the x (a,c) and y (b,d) directions. The slopes of the linear fits to CBM (red circles) and VBM (green squares) correspond to the deformation potential constants for electrons and holes, respectively.
